# Supplementary material for: Sol–gel-assisted micro-arc oxidation synthesis and characterization of a hierarchically rough structured Ta–Sr coating for biomaterials
Source: Royal Society of Chemistry journal article supplement (doi:10.1039/d0ra01079k), 2020-01-01
Supplement: d0ra01079k1.pdf [file d0ra01079k1.pdf]

### Supplementary Material

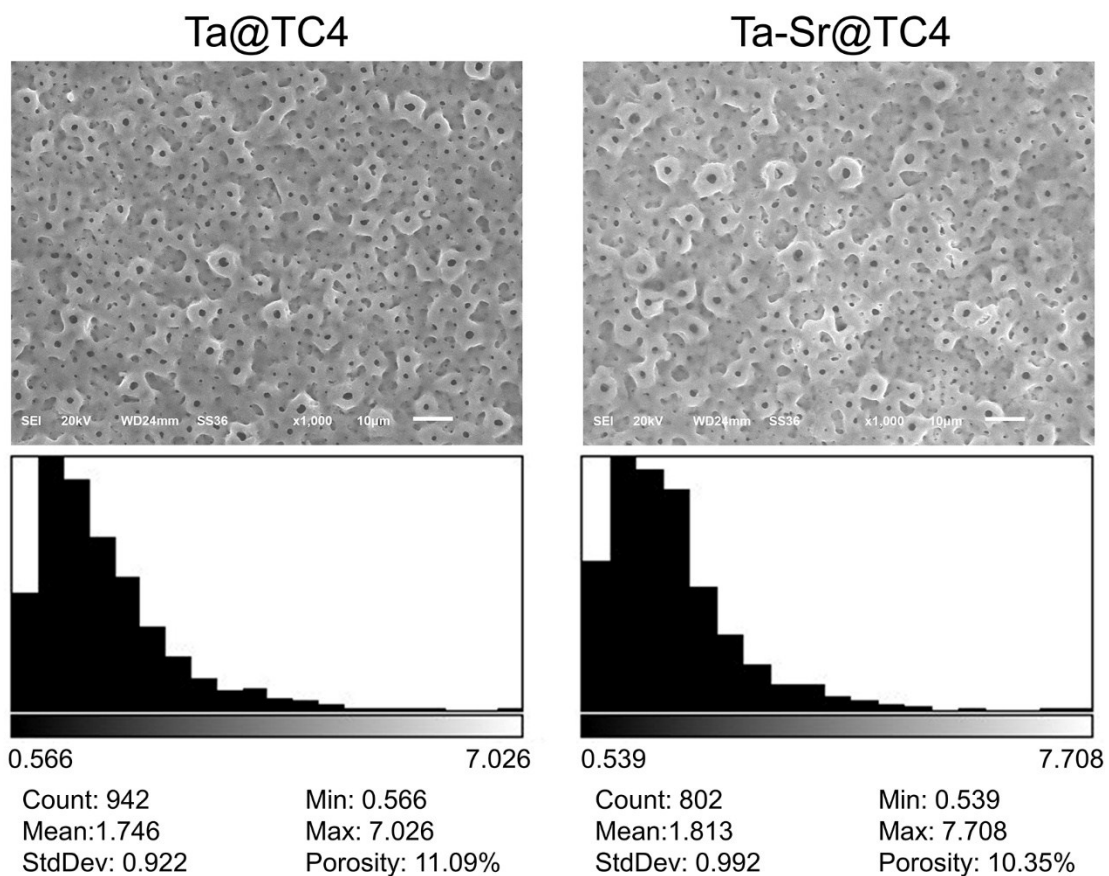

Fig.S1. The results of the porosity and pore size distribution for the Ta@TC4 and Ta-Sr@TC4 coatings.

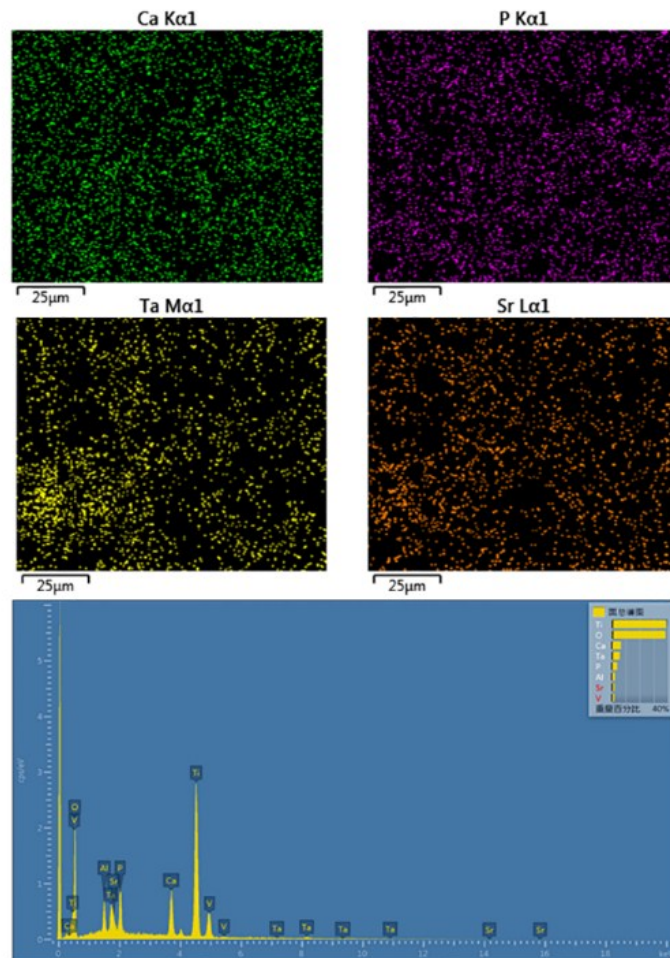

Fig.S2. Surface element distribution mapping and EDS diagram of Ta-Sr@TC4 sample.
